# Supplementary material for: Hand eczema among healthcare workers in Guangzhou City: a cross-sectional study
Source: PubMed Central journal article supplement — Ann Transl Med. 2020 Dec;8(24):1664. doi: 10.21037/atm-20-7652 (PMC7812237; doi:10.21037/atm-20-7652), 2020-12
Supplement: atm-08-24-1664-supplementary.pdf [file atm-08-24-1664-supplementary.pdf]

**Table S1** Association between risk factors and hand eczema—logistic regression analysis

|                                           | Hand eczema |            | Univariate          |         |
|-------------------------------------------|-------------|------------|---------------------|---------|
|                                           | No, n (%)   | Yes, n (%) | OR (95% CI)         | P value |
| Use of moisturizers daily                 |             |            |                     |         |
| 1                                         | 207 (40.2)  | 21 (4.1)   | 1                   | 0.999   |
| 1–5                                       | 244 (47.2)  | 27 (5.2)   | 0.991 (0.502–1.958) | 0.979   |
| 5–10                                      | 13 (2.5)    | 1 (0.2)    | 0.832 (0.094–7.349) | 0.868   |
| >10                                       | 2 (0.4)     | 0 (0.0)    | 0                   | 0.999   |
| Kitchen work time                         |             |            |                     |         |
| ≤0.5                                      | 278 (53.4)  | 30 (5.8)   | 1                   |         |
| >0.5                                      | 193 (37.0)  | 20 (3.8)   | 0.960 (0.530–1.741) | 0.894   |
| Daily hours of cleaning and doing laundry |             |            |                     |         |
| ≤0.5                                      | 320 (61.4)  | 34 (6.5)   | 1                   |         |
| >0.5                                      | 151 (29.0)  | 16 (3.1)   | 0.997 (0.534–1.863) | 0.993   |
| Frequent use of cosmetics                 |             |            |                     |         |
| No                                        | 373 (71.6)  | 38 (7.3)   | 1                   |         |
| Yes                                       | 98 (18.8)   | 12 (2.3)   | 1.202 (0.605–2.387) | 0.599   |
| Frequent use of lubricating oil           |             |            |                     |         |
| No                                        | 459 (88.1)  | 49 (9.4)   | 1                   |         |
| Yes                                       | 12 (2.3)    | 1 (0.2)    | 0.781 (0.099–6.132) | 0.814   |
| Frequent contact with metal               |             |            |                     |         |
| No                                        | 461 (88.5)  | 50 (9.6)   | 1                   |         |
| Yes                                       | 10 (2.1)    | 0 (0.0)    | 0                   | 0.999   |
| Frequent contact with raw meat            |             |            |                     |         |
| No                                        | 426 (81.8)  | 25 (8.6)   | 1                   |         |
| Yes                                       | 45 (8.6)    | 5 (1.0)    | 1.052 (0.397–2.785) | 0.919   |
| Frequent contact with plants              |             |            |                     |         |
| No                                        | 441 (84.6)  | 47 (9.0)   | 1                   |         |
| Yes                                       | 30 (5.8)    | 3 (0.6)    | 0.938 (0.276–3.192) | 0.919   |
| Frequent contact with soil                |             |            |                     |         |
| No                                        | 461 (88.5)  | 50 (9.6)   | 1                   |         |
| Yes                                       | 10 (1.9)    | 0 (0.0)    | 0                   | 0.999   |
| Hay fever                                 |             |            |                     |         |
| No                                        | 378 (72.6)  | 40 (7.7)   | 1                   | 0.966   |
| Yes                                       | 93 (17.9)   | 10 (1.9)   | 1.106 (0.490–2.107) |         |
| Asthma                                    |             |            |                     |         |
| No                                        | 463 (88.9)  | 49 (9.4)   | 1                   | 0.877   |
| Yes                                       | 8 (1.5)     | 1 (0.2)    | 1.181 (0.145–9.641) |         |
| Family history of allergy disease         |             |            |                     |         |
| No                                        | 155 (29.8)  | 17 (3.3)   | 1                   | 0.876   |
| Yes                                       | 316 (60.7)  | 33 (6.3)   | 1.050 (0.567–1.944) |         |

OR, odds ratio; CI, confidence interval.
